# Supplementary material for: The m6A methyltransferase METTL3 modifies PGC-1α mRNA promoting mitochondrial dysfunction and oxLDL-induced inflammation in monocytes
Source: PubMed Central journal article supplement — J Biol Chem. 2021 Aug 8;297(3):101058. doi: 10.1016/j.jbc.2021.101058 (PMC8406003; doi:10.1016/j.jbc.2021.101058), 2021-08-08

**Table S1 Potential target genes for *METTL3***

| Potential Target of <i>METTL3</i> |         |        |         |
|-----------------------------------|---------|--------|---------|
| PGC-1 $\alpha$                    | NDUFB6  | CYCS   | COX8A   |
| PGC-1 $\beta$                     | NDUFA6  | NDUFC2 | NDUFA12 |
| NDUFV3                            | NDUFAF1 | COX7C  |         |

**Table S2 primers for qPCR**

| Gene           | Forward                   | Reverse                |
|----------------|---------------------------|------------------------|
| COX8A          | TTACCTCCTGCTTCGTGACC      | CACTCTGGCCTCCTGTAGGT   |
| CYCS           | GGAGGCAAGCATAAGACTGG      | TCCATCAGGGTATCCTCTCC   |
| PGC-1 $\alpha$ | ACTACAGACACCGCACACACC     | CCTTTCGTGCTCATAGGCTTC  |
| NDUFC2         | CCTGTATGCTGTGAGGGACC      | CGACGTTTCAGCTCCACAACA  |
| NDUFA6         | CAGTCGGGACATGAACGAGG      | GAATTGGTGCACAGTGTTCCG  |
| NDUFA12        | ATGAATGGCAAAAACACATTCT    | GCATGTTTCAACTGTTCTTCA  |
| PGC-1 $\beta$  | AAGAACTTCAGACGTGAGAGCAGAG | GCATGCCGGACGCTTG       |
| METTL3         | CAAGCTGCACTTCAGACGAA      | GCTTGGCGTGTGGTCTTT     |
| GAPDH          | TGCCACCAACTGCTTAGC        | GGCATGGACTGTGGTCATGAG  |
| YTHDF2         | TAGCCAACTGCGACACATTC      | CACGACCTTGACGTTCTTT    |
| IL-1 $\beta$   | AACAGGCTGCTCTGGGATTC      | AGTCATCCTCATTGCCACTGT  |
| IL-6           | CGAGCCCACCGGGAACGAAA      | GGACCGAAGGCGCTTGTGGAG  |
| TNF- $\alpha$  | TTCTCCTTCCTGATCGTGGCAG    | TGATGGCAGAGAGGAGGTTGAC |
| CXCL10         | TGGCATTCAAGGAGTACCTCTC    | GGACAAAATTGGCTTGCAGGA  |
| 12S rRNA       | CCCCAGGTTGGTCAATTC        | CGGCTTCTATGACTTGGGTAA  |

**Figure S1 Confirmation of knockdown in THP-1 cells**

(A) Immunoblot detection of METTL3 protein levels in control cells and *METTL3* knockdown cells, with GAPDH as a loading control.

(B) Immunoblot detection of PGC-1 $\alpha$  protein levels in control and *PGC-1 $\alpha$*  knockdown cells lines, with GAPDH as a loading control.

(C) Immunoblot detection of YTHDF2 protein levels in control and *YTHDF2* knockdown cells lines, with GAPDH as a loading control.

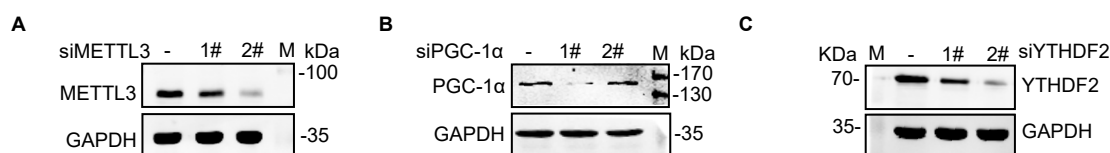

Supplement: mmc1.pdf [file mmc1.pdf]
